# Supplementary material for: Growth estimation of the larger foraminifer Heterostegina depressa by means of population dynamics
Source: PeerJ. 2019 Jan 16;6:e6096. doi: 10.7717/peerj.6096 (PMC6339478; doi:10.7717/peerj.6096)
Supplement: Supplemental Information 2 — Summarizing parameters and significance for all calculated cycles. [file peerj-07-6096-s002.xlsx]

## Sheet: 20 meters
CBR					DIR
Lomb					Lomb
a	p	T	offset		a	p	T	offset
10.1	-0.959	261.8	36.1		12.25	-1.607	304	27.67
12.77	2.079	137.1			7.926	-2.684	125.2
3.211	-1.32	80			4.495	-1.814	84.7
x²	AIC	R²	p		x²	AIC	R²	p
153.6	179.6	0.91189	0.084071		154.34	180.34	0.90883	0.011119
Nyquist					Nyquist
a	p	T	offset		a	p	T	offset
14.01	2.13	258.7	35.64		13.2	-1.647	306.3	27.24
10.2	-0.9135	136.1			9.314	2.876	136.8
5.216	-0.3346	51.92			4.833	-1.614	84.01
x²	AIC	R²	p		x²	AIC	R²	p
43.167	69.167	0.97518	0.00055815		154.48	184.48	0.91059	0.010603
Harmonic					Harmonic
a	p	T	offset		a	p	T	offset
9.82623	3.86	365	24.63		11.7456	3.87	365	25.76
6.87549	0.96	182.5			9.22462	1.38	182.5
7.73493	3.22	121.667			8.02141	3.66	121.6
x²	AIC	R²	p		x²	AIC	R²	p
156.92	182.92	0.90985	0.010816		282.97	308.97	0.83847	0.044177

## Sheet: 50 meters
CBR					DIR
Lomb					Lomb
a	p	T	offset		a	p	T	offset
7.395	1.018	288	25.67		2.991	-0.6976	320	28.51
10.24	2.634	130.9			8.053	-2.913	130.9
5.788	-2.515	68.5			4.654	-2.815	64
x²	AIC	R²	p		x²	AIC	R²	p
103	129	0.932886	8.5372e-08		171.94	197.94	0.75958	0.00010455
Nyquist					Nyquist
a	p	T	offset		a	p	T	offset
10.37	2.667	130.5	25.45		8.649	2.985	135.7	28.31
8.208	1.535	267.4			3.759	1.623	86.26
5.224	-2.206	66.9			3.824	-1.342	362.2
x²	AIC	R²	p		x²	AIC	R²	p
73.674	99.674	0.926637	1.3986e-07		467.53	493.63	0.823	1.858e-05
Harmonic					Harmonic
a	p	T	offset		a	p	T	offset
6.38848	0.288	365	27.33		4.52637	4.96	365	28
3.52369	2.39	182.5			4.35448	0.41	182.5
11.3446	3.19	121.6			10.1986	3.91	121.6
x²	AIC	R²	p		x²	AIC	R²	p
343.81	369.81	0.785	5.5e-05		335.4	361.4	0.532	0.00466
