# Supplementary material for: Growth estimation of the larger foraminifer Heterostegina depressa by means of population dynamics
Source: PeerJ. 2019 Jan 16;6:e6096. doi: 10.7717/peerj.6096 (PMC6339478; doi:10.7717/peerj.6096)
Supplement: Supplemental Information 3 — Chamber number and test diameter (µm) for each specimen for each sampling. [file peerj-07-6096-s003.xlsx]

## Sheet: chamber number
date	2014-05-02	2014-05-09	2014-05-30	2014-07-18	2014-08-19	2014-09-10	2014-10-20	2014-11-10	2014-12-11	2015-01-16	2015-02-13	2015-03-03	2015-04-15	2015-05-18	2015-06-11	2014-07-14
sample	2B	3B	4B	5B	6B	7B	8B	9B	10B	11B	12B	13B	14B	15B	16B	17B
	59	59	60	29	24	23	22		26		37	30			21	18
	34	30	51	30	29	24	26		26		37	32			22	19
	37	35	46	35	31	25	28		28		41	34			23	21
	42	39	75	36	33	25	28		28		43	39			23	23
	43	43	48	40	33	29	29		29		45	40			24	23
	44	43	62	40	33	29	29		30		46	40			25	23
	45	43	64	41	34	30	30		32		47	40			28	25
	46	45	69	44	34	30	30		32		49	41			29	25
	46	47	62	46	34	32	30		34		49	41			32	26
	49	47	57	49	35	33	31		34		50	42			32	26
	49	47	47	49	36	36	31		35		52	42			33	27
	49	47	52	49	36	36	31		36		53	44			34	28
	49	49	61	51	37	36	32		36		54	44			34	29
	51	49	53	51	37	36	33		39		56	44			34	29
	52	49	57	53	38	36	33		40		63	44			36	33
	54	50	49	53	39	37	34		40			45			38	33
	54	50	46	54	39	37	34		41			47			38	33
	55	51	40	55	40	37	35		41			49			38	34
	55	52	48	56	40	38	35		42			49			40	34
	55	52	56	59	41	38	37		42			49			40	35
	55	52	55	61	41	39	39		42			49			41	35
	55	53	56		41	40	39		45			49			41	37
	55	53	33		43	40	39		45			49			42	38
	55	54	61		44	41	39		46			50			42	39
	57	55	39		45	42	40		48			51			42	40
	57	58			45	43	41		48			51			42	40
	58	60			45	44	41		48			51			43	41
	58	60			46	44	42		48			51			44	42
	59	61			46	46	42		49			52			45	43
	61	61			46	47	43		52			52			46	43
	61	62			49	48	43		53			52			47	46
	61	65			49	50	43		55			53			48	46
	63	65			49	50	44		58			54			49	46
	63	68			52	51	44		59			55			50	46
	64	70			52	52	45		60			55			50	46
	67	77			52	58	46		62			55			50	47
	67				53	59	46					55			50	48
	67				53		46					56			52	49
	68				53		48					56			53	49
	69				65		48					57			54	49
	74				73		49					57			54	51
							50					58			54	51
							50					58			55	51
							51					59			55	52
							51					59			56	52
							51					59			56	52
							51					62			65	54
							51					63				55
							52					65				56
							52					66				58
							53					66				58
							54					69				59
							56
							57
							64

## Sheet: diameter in µm
date	2014-05-02	2014-05-09	2014-05-30	2014-07-18	2014-08-19	2014-09-10	2014-10-20	2014-11-10	2014-12-11	2015-01-16	2015-02-13	2015-03-03	2015-04-15	2015-05-18	2015-06-11	2014-07-14
sample	2B	3B	4B	5B	6B	7B	8B	9B	10B	11B	12B	13B	14B	15B	16B	17B
		1159	1264	1571	1215	869	699	582		703		1141	1147	1921		733	530
		1214	1481	1625	1215	1054	825	849		800		1404	1248	2066		765	627
		1777	1664	1700	1291	1146	871	850		811		1467	1250	2071		820	793
		1867	1860	1728	1336	1190	875	866		883		1667	1416	2085		890	822
		1911	1928	1827	1537	1265	908	878		949		1773	1522	2124		950	848
		1947	2010	1849	1744	1307	1011	887		1037		1867	1599	2191		954	865
		1985	2061	1883	2014	1331	1043	911		1271		2020	1603	2403		1023	865
		2096	2112	2107	2083	1351	1051	911		1305		2134	1624	2514		1026	876
		2130	2113	2115	2136	1359	1064	922		1329		2270	2004	2683		1031	916
		2194	2271	2155	2153	1362	1212	923		1349		2337	2115	2687		1094	957
		2281	2432	2266	2259	1423	1226	943		1371		2417	2135	2731		1122	992
		2281	2440	2319	2269	1487	1259	958		1448		2559	2156	2831		1211	1022
		2312	2464	2358	2339	1534	1265	1036		1478		2671	2165	2886		1233	1037
		2360	2530	2382	2417	1548	1265	1044		1539		2774	2210	2994		1251	1057
		2504	2542	2468	2492	1603	1349	1047		1611		3137	2241	3170		1277	1118
		2531	2555	2671	2569	1615	1415	1179		1624			2312	3235		1307	1138
		2544	2761	2762	2765	1630	1433	1185		1643			2378			1313	1147
		2548	2766	3014	2812	1657	1438	1260		1660			2385			1343	1156
		2551	2790	3291	3032	1659	1609	1307		1860			2400			1442	1218
		2563	2846	3702	3034	1812	1672	1368		1866			2426			1545	1264
		2594	2908	3894	4089	1846	1696	1385		1880			2436			1591	1326
		2614	2962			1848	1721	1400		1889			2454			1594	1382
		2632	2968			1873	1725	1455		1927			2466			1609	1409
		2694	3267			1879	1746	1481		2129			2480			1699	1413
		2697	3268			1899	1784	1508		2188			2518			1722	1444
		2699	3360			1941	1804	1515		2228			2518			1771	1562
		2750	3397			1960	1821	1518		2352			2581			1773	1579
		2756	3432			1964	1852	1535		2470			2583			1816	1607
		2789	3531			2056	1861	1571		2480			2598			1853	1625
		2919	3591			2146	1998	1609		2497			2603			1920	1667
		2934	3615			2204	2042	1614		2508			2663			1936	1740
		3106	3648			2244	2099	1637		2537			2677			2024	1761
		3130	3790			2344	2139	1668		2543			2701			2057	1826
		3161	3969			2344	2276	1762		2716			2711			2140	1840
		3176				2508	2336	1786		2766			2780			2146	1932
		3243				2813	2428	1817		3507			2827			2282	1937
		3353				2935	2985	1844					2922			2332	1937
		3400				3369		1857					2933			2390	2087
		3706				3483		1954					2979			2435	2113
		3735				3507		1993					3038			2462	2161
						4395		2061					3081			2477	2167
								2079					3100			2645	2174
								2107					3220			2723	2211
								2132					3300			2787	2358
								2172					3309			3246	2444
								2218					3332			3367	2503
								2220					3335			3532	2839
								2243					3359				2975
								2274					3463				2978
								2392					3482				3510
								2523					3549				3658
								2608					3644				3776
								2647
								3028
								3313
