# Supplementary material for: Growth estimation of the larger foraminifer Heterostegina depressa by means of population dynamics
Source: PeerJ. 2019 Jan 16;6:e6096. doi: 10.7717/peerj.6096 (PMC6339478; doi:10.7717/peerj.6096)
Supplement: Supplemental Information 4 — Chamber number and test diameter (µm) for each specimen for each sampling. [file peerj-07-6096-s004.xlsx]

## Sheet: chamber number
date	2014-05-02	2014-05-09	2014-05-30	2014-08-19	2014-09-10	2014-10-20	2014-11-10	2014-12-11	2015-01-16	2015-02-13	2015-03-03	2015-04-15	2015-05-18	2015-06-11	2014-07-14
sample	2A	3A	4A	6A	7A	8A	9A	10A	11A	12A	13A	14A	15A	16A	17A
	56	52	38	55	31	38	31	37	54	35	35	63	56	37	49
	53	39	57	56	36	52	36	32	29	56	36	57	40	32	50
	47	40	52	68	47	38	37	29	48	50	41	50	45	14	67
	48	48	52	61	40	33	44	45	40	50	49	54	38	29	54
	42	31	61	41	56	48	54	32	70	43	54	54	32	25	39
		45	51	31	39	47	68	63	56	27	48	56	48	47	57
		40	37	54	56	52	52	31	51	37		60	37	34	64
		31	44	53	39	60	45	47	50	49		60	42	50	46
		64	57	26	48		55	25	53	56		58	46	36	45
		38	58	27	41		52	62	41	42		49	56	59	57
		52	69	20	39		54	51	29	35		38	65	67	57
		39		55	42		46	62	24	61		68		39	46
		33		50	57		67	49	20			39		28	39
		43		37	68		57	47	20			24		49	46
		46		51			57	56	29			42		42	51
		50		46			55	46	32			57		51	57
		58		47			68		30			42			52
		52		36			60		26			41			68
		38					58		37			46			61
		38					53		32			49			62
		47					61		31			39			52
		38							37			46			58
		30							30			20			68
		50							28			57			61
		59							28			32			27
		53							42			35			22
		62							40			43			29
		69							58			32			31
		50							44			36			19
		57							26			43			36
		70							49			38			28
		44							63			48			39
		67													38
		29													45
		25													38
		39													21
		42													43
		34													48
		34													40
		51													40
		47													52
		40													48
		51
		51
		56
		58
		70

## Sheet: diameter in µm
date	2014-05-02	2014-05-09	2014-05-30	2014-08-19	2014-09-10	2014-10-20	2014-11-10	2014-12-11	2015-01-16	2015-02-13	2015-03-03	2015-04-15	2015-05-18	2015-06-11	2014-07-14
sample	2A	3A	4A	6A	7A	8A	9A	10A	11A	12A	13A	14A	15A	16A	17A
	4635	4187	2641	5268	1816	2269	1206	2132	5543	1428	2457	4972	3727	1816	3858
	4900	3687	4891	3831	2094	2189	1264	2083	1832	3189	2476	4308	2606	1853	4253
	3822	3900	4643	3867	2843	2237	1361	891	3825	2849	3073	4683	3221	678	4448
	5188	4151	4210	4992	2278	1249	1669	2637	2986	3211	2068	4903	2823	1025	4690
	1693	2806	4430	3172	4280	2673	2387	2590	5364	3054	3608	4754	2546	1034	2747
		3149	4286	2569	2958	2867	2467	2973	4794	1506	3993	4391	3635	2382	3528
		3069	3527	4437	3463	3099	2439	1115	2980	2101		5119	2791	2392	5020
		1999	3383	4551	3483	3603	2451	2812	4106	3414		5020	2834	3391	2453
		3289	4958	1360	3611		2695	1280	4465	4270		4816	3449	2735	3827
		1434	4948	1621	3715		2983	3204	2929	3619		2914.83	4302	4667	3731
		2365	5030	1190	2861		3969	3334	1151	1892		2986.46	3347	4134	3196
		1525		4413	3456		2781	3458	1110	4319		2940.62		2550	3416
		1362		4540	4609		3082	3183	1077			2340.84		1139	2706
		2795		2538	4605		3543	3715	1160			1110.73		3231	2993
		1895		4643			2328	4773	1640			1517.58		3376	3699
		3058		3756			2920	3409	1852			4587.13		4227	3264
		2425		3832			3973		1925			3164.1			4983
		2185		1891			3006		1378			4250			5870
		2535					3867		1540			3705			4198
		3270					3750		1825			3928			3712
		3791					4047		2098			2693			4006
		4132							1962			3142			4083
		4576							1985			1171			4522
		2143							1785			3366			5430
		2694							1796			1955			1194
		3378							2446			1905			1291
		1977							2584			2751			1703
		1976							4473			2100			1438
		4412							2796			2079			981
		4541							1491			2604			1864
		4235							4040			3024			1366
		4902							4423			2625			1755
		4705													1788
		1414													1944
		1241													1900
		1816													1230
		1963													2104
		1982													2873
		2248													2600
		2567													3176
		2410													3438
		1998													3610
		3405
		2989
		4162
		4420
		2410
		5575
		4695
